## Addendum: Prognostic significance of isochromosome 17q in hematologic malignancies

**Dorota Koczkodaj<sup>1</sup>, Justyna Muzyka-Kasietczuk<sup>2</sup>, Sylwia Chocholska<sup>2</sup> and Monika Podhorecka<sup>2</sup>**

<sup>1</sup>Department of Cancer Genetics with the Cytogenetic Laboratory, Medical University of Lublin, Lublin, Poland

<sup>2</sup>Department of Hematooncology and Bone Marrow Transplantation, Medical University of Lublin, Lublin, Poland

**Published:** February 11, 2023

**Copyright:** © 2023 Koczkodaj et al. This is an open access article distributed under the terms of the [Creative Commons Attribution License](https://creativecommons.org/licenses/by/3.0/) (CC BY 3.0), which permits unrestricted use, distribution, and reproduction in any medium, provided the original author and source are credited.

**Consent was added to this article:** Patient consent was required and obtained. The authors received approval from the Medical University Ethics committee to perform the genetic studies presented.

Original article: Oncotarget. 2021; 12:708–718. <https://doi.org/10.18632/oncotarget.27914>
